# Supplementary material for: Surface-modified measles vaccines encoding oligomeric, fusion-stabilized SARS-CoV-2 spike glycoproteins bypass measles seropositivity, boosting neutralizing antibody responses to omicron and historical variants
Source: PubMed Central journal article supplement — bioRxiv. 2022 Dec 16:2022.12.16.520799. Preprint. [Version 1] doi: 10.1101/2022.12.16.520799 (PMC9774211; doi:10.1101/2022.12.16.520799), 2022-12-16
Supplement: media-1.pdf [file media-1.pdf]

Supplementary Materials for

**Surface-modified measles vaccines bypass measles-immunity, boosting neutralizing antibody responses to Omicron and ancestral strains**

Miguel Á. Muñoz-Alía et al.

\*Corresponding author. Email: [mamunoz@vyriad.com](mailto:mamunoz@vyriad.com)

**This PDF file includes:**

Figs. S1 to S5

**Fig. S1.**

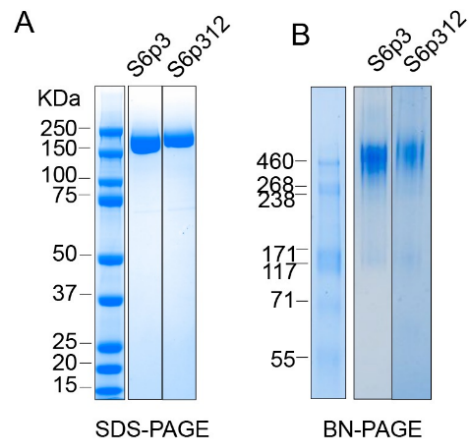

**Related to Figure 2.** (A) SDS-PAGE of the purified proteins. Protein (1  $\mu$ g) was separated by SDS-PAGE (4-12% Bis-Tris gel) electrophoresis, followed by Coomassie staining. (B) BN-Native gel analysis of the purified proteins. Protein (1  $\mu$ g) was separated by BN-Native electrophoresis (4-16% Bis-Tris), followed by Coomassie staining.

**Fig. S2.**

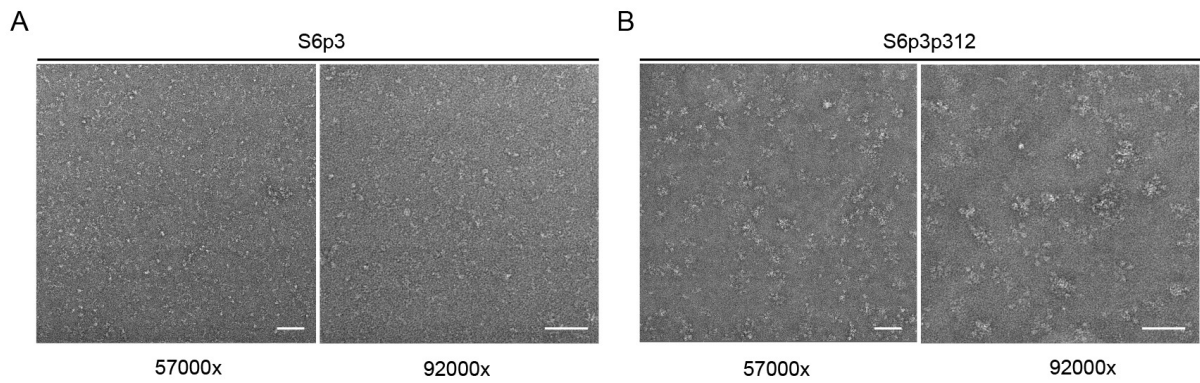

**Related to Figure 2.** Representative electron micrographs of negatively stained SARS-CoV-2S6p3 (A) and SARS-CoV-2S6p312 (B). Images were collected by Talos L120C 120 kV TEM with a magnification of 57kx and 92kx. Scales bars, 100nm.

**Fig. S3.**

| Virus                | Gene       | Nucleotide Mutation | Amino acid substitution |
|----------------------|------------|---------------------|-------------------------|
| MR-SARS-CoV-S6pΔCT)P | ATU        | t5565c              | Y707H                   |
|                      |            | t5579c              | syn                     |
|                      |            | t5626c              | L727P                   |
|                      |            | t5701c              | L752P                   |
|                      |            | t5712c              | Y756H                   |
|                      |            | t5721c/t5722c       | F759P                   |
|                      |            | t5738c              | Syn                     |
|                      |            | t5746c              | L767P                   |
|                      |            | t5811c              | Y789H                   |
|                      |            | t5825c              | syn                     |
|                      |            | t5827c              | I794T                   |
|                      |            | t5835c              | F797L                   |
|                      |            | t5844c              | F800L                   |
|                      |            | t5849c              | syn                     |
|                      |            | t5850c              | F802L                   |
|                      |            | t5860c              | I805T                   |
|                      |            | t5861c              | syn                     |
| t5873c               | syn        |                     |                         |
| t5911c               | L822P      |                     |                         |
| t6108c               | F888L      |                     |                         |
| t6138c               | F898L      |                     |                         |
| del7140              | Frameshift |                     |                         |
| H                    | c11335a    | syn                 |                         |
| MR-SARS-CoV-         | ATU        | c6175t              | A890V                   |
| MR-SARS-             | N          | t398c               | syn                     |
|                      |            | t411c               | syn                     |
|                      |            | t467c               | syn                     |

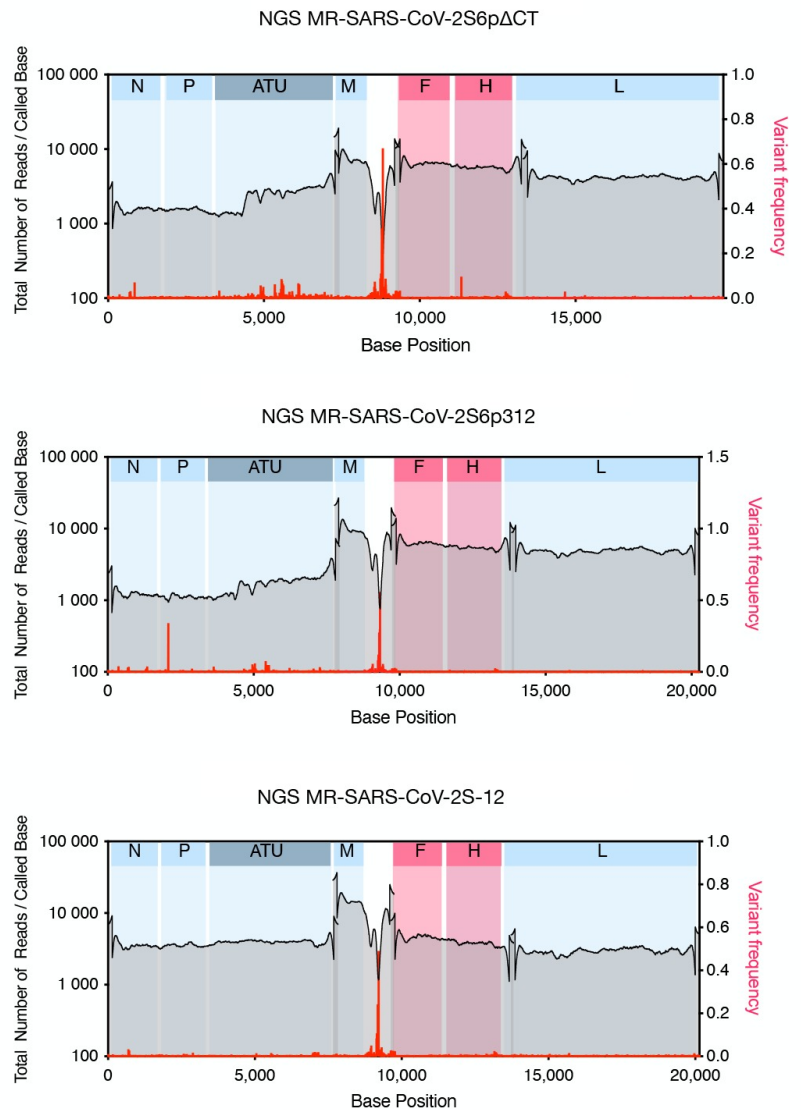

**Sequence divergence of rescued viruses from cloned cDNA.** Shown are rescued viruses in which nucleotide mutations were found. The genome coverage and allelic frequency of from Next-Generation Sequencing is also shown. Blue areas represent viral coding sequences, while white areas indicate intergenic regions and untranscribed terminal regions of the genome.

**FIG S4.**

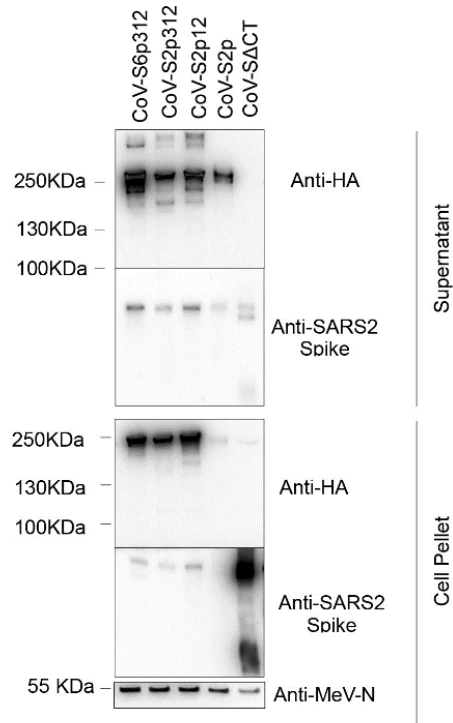

**Related to Figure 3.** Expression of SARS-CoV-2 spike-based constructs from the rMeV-MR vector. Vero cell lysates and supernatants were analyzed by western blotting two days after infection with the various spike-based measles vector constructs at an MOI of 0.03. The antibodies used for immunodetection as well as the molecular weight of a standard are indicated.

FIG S5.

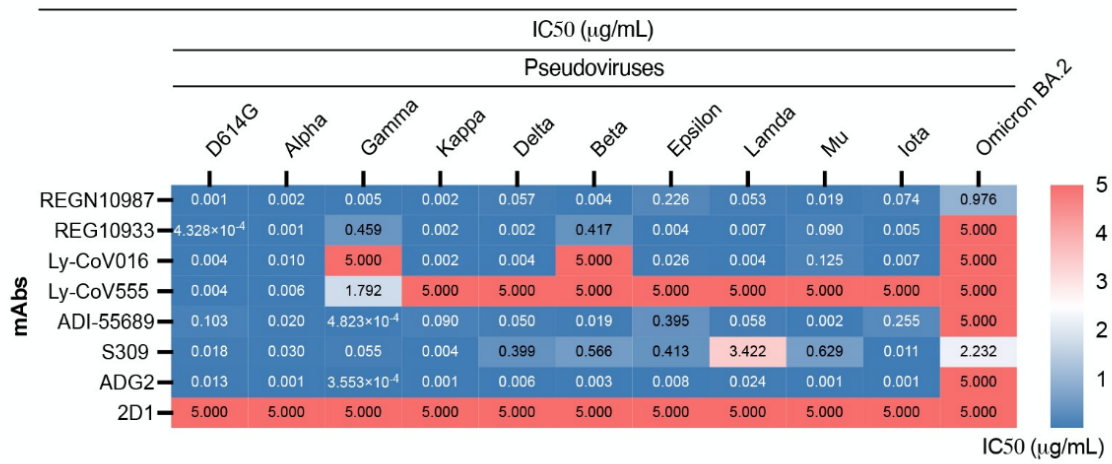

Related to Figure 6. Pseudovirus neutralization assay of commercial mAbs against SARS-CoV-2 variants. Half-maximal inhibitory concentration (IC50) values calculated from neutralization curves are plotted. 2D1 antibody was used as negative control.
